# Supplementary material for: Scoping review using PRISMA-SCR on m-health interventions on self-care management of type 2 diabetes at home
Source: Research Square preprint supplement (doi:10.21203/rs.3.rs-1680004/v2), 2022-06-10
Supplement: Supplementary file 1 [file becf831743160488ce2906ce.docx]

Annexure-1: Charting Data N=40 Scoping review

| **SI No.** | **Author/ Date** | **Participants No. and description** | **Context/Setting/Sample** | **Intervention/ Duration** | **Method** | **Findings** | **Conclusion/Gaps (Future Research)** |
| --- | --- | --- | --- | --- | --- | --- | --- |
| 1 | Enying Gong etal 2020 | 187 Adults with type 2 diabetes | Participants were randomly distributed to the intervention (n=93) and control (n=94) arms. | My Diabetes coach | Measuring glycated hemoglobin (HbA1c) and health-related quality of life  (HRQoL) | the mean estimated HbA1c decreased in both arms at 12 months (intervention: 0.33% and control: 0.20%) | wider implementation of technology-enabled conversation-based programs for supporting diabetes self-management |
| 2 | Lyndsay A et al 2020 | 248 racially and  socioeconomically diverse patients with type 2 diabetes (T2D). | The participants were, on average, aged 55.8 (SD 9.8) years, 55.2%  (137/248) female, and 52.0% (129/248) non-White; 40.7% (101/248) had ≤ a high  school education, and 40.7% (101/248) had an annual household income <US $25,000. The median response rate to interactive texts was 91% (IQR 75%-97%) over 12 months. | Text message-delivered intervention supporting diabetes self-care, called REACH (Rapid Education/ Encouragement and Communications for Health) 12 months | Participants completed a survey and  hemoglobin A1c (HbA1c) test and received REACH text messages, including self-care promotion texts, interactive texts asking about medication adherence, and adherence feedback texts | Engagement gradually declined throughout the intervention but remained high. Engagement did not differ by age, gender, education, income, diabetes duration, insulin status, health literacy, or numeracy. Black race and worse baseline medication adherence and HbA1c were each associated with lower  engagement, although the effects were small | Well-designed interactive text messages can engage diverse patients in a self-care intervention for at least 1 year Variation in and reasons for frequency preference suggest that offering a frequency choice may be important to users' engagement. |
| 3 | Heather M young et al 2020 | 287 participants completed the study (155  control and 132 intervention) | The inclusion criteria were as follows: (1) enrolled at 1 of 3 primary  care clinics, (2) aged 18 years or above, (3) living with type 2 diabetes, and (4) English-speaking. outcome measures were collected at baseline, 3 months, and 9 months | Intervention entailed nurse health coaching and mHealth technology to track  patient-generated health data and integrate these data into an electronic health record. | Primary outcome was diabetes self-efficacy; secondary outcomes were  depressive symptoms, perceived stress, physical functioning, and emotional distress and anxiety. | The participants in the intervention group had  significant improvements in diabetes self-efficacy and a decrease in depressive symptoms compared with usual care at 3 months with no differences in the other outcomes. | Further research should  evaluate the smallest dose of coaching required to continue progress after active  intervention and the potential of technology to provide effective ongoing  automated reinforcement for behavior change. |
| 4 | Yeoree yang 2020 | Overall, 150 (9 clinics) and 97 (4 clinics) participants  with T2DM were assigned to the intervention and control groups, | This is a multicenter, cluster-randomized controlled, open trial, 13  primary care clinics in Seoul and other large cities in South Korea were voluntarily recruited. Overall, 150 (9 clinics) and 97 (4 clinics) participants  with T2DM were assigned to the intervention and control groups, respectively (2:1  allocation) | participants in both groups attended face-to-face physicians' consultation for the management of diabetes in the clinic.  Intervention group, participants had to upload their daily  self-monitoring of blood glucose (SMBG) results using the mobile phone app in addition to outpatient care for 3 months. | Physicians had to check their patients' SMBG results through an administrator's website and send a short feedback message at least once a week. At baseline and 3 months, both groups had anthropometry and blood tests, including hemoglobin A1c (HbA1c), and responded to questionnaires about treatment satisfaction and compliance | Intervention group showed significantly more improvement in HbA1c (adjusted mean difference to control -0.30%, 95% CI -0.50 to -0.11; P=.003) and fasting plasma glucose (-17.29 mg/dL, 95% CI -29.33 to -5.26; P=.005) than those in the control group. In addition, there was significantly more reduction in blood pressure, and the score about treatment  satisfaction and motivation for medication adherence increased more in the intervention group than in the control group. | The mobile phone-based glucose-monitoring and feedback system was  effective in glycemic control when applied in primary care clinic settings. This  system could be utilized effectively with diverse institutions and patients |
| 5 | ESteher du Ponm 2019Type 2 diabetes | 203 patients with T2DM | To investigate whether a group  education program can improve the use of an online care platform in patients with  T2DM treated by primary care providers in the Netherlands | The Proactive Interdisciplinary Self-Management (PRISMA) program,  aimed at improving patients' self-management skills, was expected to encourage patients to manage their disease using an online platform. | In a randomized controlled trial, patients with T2DM received either PRISMA with usual care or usual care only. During a six-month follow-up period in 2014-2015, usage (number  log-ons and time spent per session) of an online care platform (e-Vita) aimed at improving T2DM self-management was assessed. | No differences were found between the intervention and control groups in the number  of patients who attended the platform training | Only a small proportion of the patients logged on twice or more.  Patients probably need other encouragements to manage their condition using an online platform |
| 6 | Lei Zhang, 2019Type 1 and 2 Diabetes | 276 type 1 or type 2 diabetes patients | To investigate the effectiveness of an  app-based interactive management model by a professional health care team on glycemic control in Chinese patients with poorly controlled diabetes | Study was 6-month long, single-center, prospective randomized  controlled trial. Patients were randomly assigned to the control group (group A), app self-management group(group), and app interactive management group (group C) in a 1:1:1 ratio. | The primary outcome was the change in glycated hemoglobin (HbA1c) level. | At months 3 and 6, all 3 groups showed significant decreases in HbA1c levels (all P<.05). Patients in the app interactive management group had a significantly lower HbA1clevel than those in the app self-management group at 6 months (P=.04). The average HbA1c reduction in the app interactive management  group was larger than that in the app self-management and control groups at both months 3 and 6 (all P<.05) | It was difficult to achieve long-term effective glucose improvement by using app self-management alone, but combining it with interactive management can help  achieve rapid and sustained glycemic control. |
| 7 | Astrid Torbjørnsen 2019 | 24 adults with type 2 diabetes | Two researchers conducted 24 semi-structured in-depth interviews with adults with type 2 diabetes who had used a digital diabetes diary app for 1 year, during participation in the Norwegian Study in the EU project RENEWING Health. | Use of digital diabetes diary app for 1 year | The transcripts of the interviews were analyzed  using qualitative content analysis on developing themes, which we interpreted  according to a theory of acceptability. | The users' acceptability of the app diverged. Overall, the responses  indicated that the use of a digital diabetes diary requires hard work, but could also ease the effort involved in following a healthy lifestyle and better-controlled levels of blood glucose | We need to be aware of both digital and clinical distress when diabetes apps form a part of relevant healthcare. |
| 8 | Louise Poppe 2019 | 117 Participants [RCT (n=54) + RCT 2 (n=63)] RCT 1 was conducted with adults with T2DM. RCT 2 was performed  in adults aged ≥50 years | My Plan 2.0 is a fully automated  electronic health (eHealth) and mobile health (mHealth) intervention targeting  physical activity (PA) and sedentary behavior (SB) based on the health Action  Process Approach (HAPA). | This study aimed to test the short-term effect of My Plan 2.0 in  altering levels of PA and SB and in changing personal determinants of behavior | The participants in the intervention group were instructed to go through My Plan 2.0, comprising 5 sessions with an interval of 1 week between each session. The primary outcomes were objectively measured and  self-reported PA and SB. Secondary  outcomes were self-reported behavioral determinants for PA and SB. | In RCT 1 (n=54), the PA intervention group showed a decrease in self-reported time spent sitting (P=.09) and an increase in accelerometer-measured moderate (P=.05) and moderate-to-vigorous PA  (P=.049). The SB intervention group displayed an increase in accelerometer-assessed breaks from sedentary time in comparison with the control group (P=.005). | My Plan 2.0, was able to improve only some of the primary outcomes. |
| 9 | Katja von Storch 2019 | Participants with T2DM included 60 adults in the intervention group (M = 59.4 years) and 55 adults in the control group (M = 58.4 years) | Study was aimed to evaluate the effects of telemedicine-assisted self-management program offered to T2DM patients, in terms of glycated hemoglobin (HbA1c) values and self-management behavior, of a by a large private health insurance company. | Intervention group was provided with a tablet computer, a glucometer, and a step counter. Additionally, they received individual need-based telephone coaching to address and improve motivation and diabetes self-management in daily life. The control group received care as usual and were not offered additional treatment. The study examined the  results of a diabetes lifestyle program after 3 months. |  | The intervention resulted in significantly greater declines in HbA1c compared with the control  group. participants showed significant improvements in Diabetes Self-Management scale score and body mass index compared with usual care  participants. | Patients with T2DM can benefit from  telemedicine-assisted self-management programs, which may offer new options for  treatment and prevention of disease progression. Follow-up and research are  needed to assess feasibility and effectiveness on a larger scale. |
| 10 | Yanmei Wang 2019 | 120 patients with type 2 diabetes | To explore the clinical effect of continuous care for patients with type 2 diabetes using mobile health application | The test group received continuous care based on the mobile phone  application (n = 60), and the control group received conventional care (n = 60). | Primary clinical outcomes, such as Glycemic Hemoglobin (GH) levels, blood  glucose levels, self-care abilities, disease cognition abilities, and the number  of re-admissions, were examined in both groups. | The results showed significant improvements about disease  awareness levels (81.28 vs 71.34, P < .05), self-management abilities (9.14 vs 7.81, P < .05), GH (-1.50% vs -0.76%, P < .05), fast blood glucose (-3.23 vs -1.25 mmol/L, P < .05), postprandial blood glucose levels (-4.34 vs -2.34 mmol, P < .05), and control levels in the test group. Moreover, in the test group, the  frequency of rehospitalization was reduced during the intervention period, as was the average number of rehospitalization within 6 months after discharge (-1.19 vs P < .05). | Continuous care based on a mobile health application has potential  as a management strategy for patients with type 2 diabetes. |
| 11 | Michele Heisler, 2019 | 290 Veterans Affairs patients with A1C ≥8.0% | To examine whether a peer coaching  intervention is more effective in improving clinical outcomes in diabetes when  enhanced with e-health educational tools than peer coaching alone | The effectiveness of peer coaches who used an individually tailored,  interactive, web-based tool (decide) was compared with peer coaches with no  access to the tool | Patients received a 6-month intervention with a first session with a fellow patient trained to be a peer coach, followed by weekly phone calls to discuss behavioral goals. Participants were randomized to coaches who used decide or  coaches who used non tailored educational materials at the first session. | Participants in both groups improved A1C values (>-0.6%, P < .001) at 6  months and kept these gains at 12-month follow-up (>-0.5%, P < .005).  Diabetes social support was improved at both 6 and 12 months (P < .01). | Clinical gains achieved through a volunteer peer coach program were  not increased by the addition of a tailored e-health educational tool. |
| 12 | Yuan Yu 2019 | 185 patients with mean age of 52 years | Aim of the present study was to evaluate the effects of a mobile phone  application (MPA) combined with or without self-monitoring of blood glucose  (SMBG) on glycemic control in patients with diabetes | The study was a 24-week period, four-arm parallel group,  non-blinded, randomized trial. A total of 185 patients with mean age of 52 years were randomized to group A (no MPA and no SMBG), group B (SMBG only), group C (MPA only) and group D (both MPA and SMBG were used). | Changes in glycated  hemoglobin (HbA1c), fasting plasma glucose and 1,5-anhydroglucitol from baseline to week 24 were analyzed. | At 24 weeks, the HbA1c levels in patients of all groups decreased  significantly from baseline. There were significant differences in the  proportions of patients that achieved HbA1c <7% between groups, especially in group C and group D, compared with group A at week 24 | Implementation of the MPA, Diabetes-Care, is effective in improving  the proportion of HbA1c <7% in patients with type 2 diabetes. |
| 13 | Payal Agarwal2019 | 110+113 =223 participants | randomized controlled trial of the BlueStar mobile app to determine if app usage  leads to improved HbA1c levels among diverse participants in real-life clinical  contexts. | 110 participants randomized to the immediate treatment group (ITG) received the intervention for 6 months, and 113 participants randomized to the wait-list control (WLC) group received usual care for the first 3 months and then received the intervention for 3 months | The primary outcome was glucose  control measured by HbA1c levels at 3 months. Secondary outcomes assessed intervention impact on patient self-management, experience of care, and self-reported health use using validated scales, including the Problem Areas in Diabetes, the Summary of Diabetes Self-Care Activities, and the  EuroQol-5D. | The results of an analysis of covariance controlling for baseline HbA1c  levels did not show evidence of intervention impact on HbA1c levels at 3 months | Future research into the patient and site-specific factors that  increased app utilization is needed. |
| 14 | Dina Griauzde 2019 | 244 Participants | To examine the feasibility and acceptability of a mobile health (mHealth) intervention designed to increase autonomous motivation and healthy behaviors among adults with prediabetes | In this 12-week, parallel, 3-arm, mixed-methods pilot randomized  controlled trial, participants were randomized to (1) a group that received information about prediabetes and strategies to prevent T2DM (control); (2) a group that received a mHealth app that aims to increase autonomous motivation  among users (app-only); or (3) a group that received the app plus a physical activity tracker and wireless-enabled digital scale for self-monitoring (app-plus) | Primary outcome measures included rates of intervention uptake (number of individuals enrolled/number of individuals assessed for eligibility),  retention (number of 12-week survey completers/number of participants), and adherence (number of device-usage days). The secondary outcome measure was change in autonomous motivation (measured using the Treatment Self-Regulation Questionnaire), which was examined using difference-in-difference analysis. Furthermore, we conducted post intervention qualitative interviews with participants. | Retention rates were significantly  higher among app-plus participants than participants in the other 2 study arms combined (P=.004, χ2). No significant differences were seen in adherence rates between app-only and app-plus participants (43 days vs 37 days; P=.34). Among all participants, mean autonomous motivation measures were relatively high at baseline (6.0 of 7.0 scale), with not statistically significant within- or between-group differences in follow-up scores | Future work should (1) examine the effectiveness of a refined intervention on clinically relevant outcomes (e.g., weight loss) among a larger population of Diabetes Prevention Programs (DPPs) non-enrollees with low baseline autonomous motivation and (2) find other factors associated with DPP non enrollment, which may serve as additional potential targets for interventions |
| 15 | Ebaa Al-Ozairi 2018 | 572 individuals with type 2 diabetes in Kuwait. | To test whether automated  personalized health text messages based on principles of motivational  interviewing and are responsive to biodata delivered remotely is potentially  effective in improving glycemic control compared to usual care | A computer program will deliver over 400 text messages over a  12-month period using algorithms which provide participants with information on  diet and physical activity as well as personalized messages about motivators  to change behaviors | The primary outcome is change in HbA1c and weight at 12 months in  both study arms. Secondary outcomes will include changes in physical activity,  fasting lipids and quality of life in both study arms. | Study is not yet finished. | The potential of mobile phones in improving diabetes self-care in  settings with a high prevalence of diabetes and widespread mobile phone usage have  face validity. |
| 16 | Hérica Cristina Alves de Vasconcelos 2018 | 31 patients with type 2 diabetes | To analyze the effect of a health tele coaching programme in the control of  type 2 diabetes. | The control group received usual nursing care, and those in the intervention group received usual care and tele coaching for 24 weeks. | Thirty-one patients with  type 2 diabetes were divided into control and intervention groups | The intervention group improved: measurements of abdominal  circumference, systolic and diastolic blood pressure, and body mass index.  variables related to glycemic control (fasting venous glucose and glycated  hemoglobin/HbA1c); and high-density lipoprotein levels. | It is recommended that the study should be developed to include more people and run over the long term. |
| 17 | Meghan Bradway 2018 | 101 participants | To prove the potential of  analyzing mHealth usage-logs by presenting an in-depth analysis as a preliminary study for using behavioral theories to contextualize the user-recorded results of mHealth intervention studies | The Few Touches Application was tested in a year-long intervention, which allowed participants to register and review their blood glucose, diet and physical activity, goals, and access general disease information | Usage-logs, i.e., logged interactions with the mHealth devices, were collected from participants (n = 101) in the intervention groups. HbA1c was collected (baseline, 4- and 12-months. | There was n = 29 non-mHealth users, n = 11 short-term users and n = 61 long-term users. Non-mHealth users increased (+0.33%) while Long-term users reduced their HbA1c (-0.86%), which was significantly different (P = .021). Long-term users significantly decreased their usage over the year (P < .001). | By comparing participants based upon their usage-logs, we were able to discern differences in HbA1c as well as usage patterns. |
| 18 | J Comp Eff Res. 2018 | NA | To evaluate the WhatsApp social networking application for improving knowledge, self-efficacy, and awareness about diabetes management. | The intervention group received  weekly educational messages using WhatsApp, while the control group received regular care. | study was conducted with intervention and control groups at  Teaching Hospital in Al-Khobar, Saudi Arabia. | compared with the control group, the diabetes knowledge and self-efficacy of the intervention group increased significantly after the intervention with the WhatsApp application. | The WhatsApp application can be effectively used for enhancing  diabetes knowledge, self-efficacy, and awareness among the Saudi population. |
| 19 | Amutha Ramadas 2018 | 128 Participants | To evaluate the effects of a 6-month web-based dietary intervention on Dietary Knowledge, Attitude and Behavior (DKAB), Dietary Stages of Change (DSOC), fasting blood glucose (FBG) and glycosylated hemoglobin (HbA1c) in patients with uncontrolled HbA1c (> 7.0%) in a randomized-controlled trial (myDIDeA) in Malaysia. | The e-intervention group (n = 62) received a 6-month web-delivered  intensive dietary intervention while the control group (n = 66) continued with their standard hospital care. | Outcomes (DKAB and DSOC scores, FBG and HbA1c) were compared at baseline, post-intervention, and follow-up. | While both study groups showed improvement in total DKAB score, the  margin of improvement in mean DKAB score in e-intervention group was larger than the control group at post-intervention (11.1 ± 0.9 vs. 6.5 ± 9.4, p < 0.001) and follow-up (19.8 ± 1.1 vs. 7.6 ± 0.7, p < 0.001), as compared to the baseline. | Most important impact of myDIDeA was on the overall DKAB score. This study is one of the first to prove that an e-intervention can be a feasible method for implementing chronic disease management in developing countries. |
| 20 | Anna Beth Barton 2018 | 182 recipients all African Americans with type 2 diabetes | A telemedicine intervention designed to reduce treatment nonadherence and clinical inertia | This intervention included two  nurse-administered components: (1) monthly self-management education targeting improved treatment adherence; and (2) quarterly medication management facilitation designed to support treatment intensification by primary care. | For each medication management facilitation encounter, we learned whether patients met treatment goals, and if not, whether primary care recommended treatment intensification following the encounter. We assessed disease control associated with encounters, where intensification was/was not recommended. | Intensification was not recommended in 67.5% of encounters in which hemoglobin A1c was above goal,  72.5% in which systolic blood pressure was above goal, and 73.9% in which low-density lipoprotein cholesterol was above goal. | Despite enhancing treatment adherence, this intervention was unsuccessful in countering clinical inertia, likely explaining its lack of effect on CVD risk factors. |
| 21 | Elizabeth M Heitkemper 2017 | 220 adults with poorly controlled T2DM | To describe the characteristics and  technology training needs of underserved adults with type 2 diabetes mellitus  (T2DM) who took part in a health information technology (HIT) diabetes  self-management education (DSME) intervention. | Intervention participants received a  1-time intervention training, which included basic technology help, introduction to the Mobile Diabetes Detective (MoDD) website and text message features, and account activation that included subject-specific tailoring. Four added  on-site sessions for participants needing computer or Internet access or technology support were made available based on need. | Data regarding on-site visits for usual care were collected. Data were analyzed using descriptive statistics and bivariate analysis. | The participants were predominantly  Hispanic and female with a baseline mean A1C of 10% (86 mmol/mol). Only half of the participants regularly used computers or text messages in daily life. The Average introductory MoDD training session lasted 73.6 minutes. Following training, approximately one-third (35%) of intervention participants returned for  basic and MoDD-specific technology assistance at their federally qualified health center. The most frequently reported duration for the extra training sessions was  30 to 45 minutes. | Training and support needs were greater than anticipated. Diabetes educators should assess technology abilities prior to  implementing health information technology (HIT) diabetes self-management  education (DSME) in underserved adults. Future research must invest resources in  technology access, expect subject training, and develop new training  approaches to ensure HIT DSME use and engagement. |
| 22 | Leonard E Egede 2017 | 255 Participants. African American adults ≥18 years) with poorly controlled type 2 diabetes (HbA1c ≥9%) | To assess the efficacy of a joint telephone-delivered education and  behavioral skills intervention (TBSI) in reducing hemoglobin A1c (HbA1c) levels | All participants received 12 telephone-delivered 30-min  intervention sessions specific to their assigned group. Participants were  assessed at baseline and 3, 6, and 12 months | Participants were randomly assigned to one of four groups: 1) knowledge only, 2) skills only, 3) combined knowledge and skills (TBSI), or 4) control group.  The primary outcome was HbA1c at 12 months post-randomization in  the intent-to-treat (ITT) population. | HbA1c at 12 months for the intervention groups did not differ significantly from that of the control group (knowledge: 0.49, p = 0.123; skills: 0.23, p = 0.456; combined: 0.48, p = 0.105) | joint education and skills training did not achieve greater reductions in  glycemic control (i.e., HbA1c levels) at 12 months compared to the control group |
| 23 | Paula M Trief 2016 | 280 Participants | To compare glycemic control and secondary outcomes of a 4-month  telephonic couples’ behavioral intervention to individual intervention, and to education, for adults with type 2 diabetes. | All arms had self-management education (two calls). CC and IC had 10 additional behavior change calls. CC addressed collaboration and  relationships/communication. Participants consisted of 280 couples, among whom one partner had type 2 diabetes and an A1C level ≥7.5% | A randomized trial with the following three arms: couples calls (CC) (n = 104); individual calls (IC) (n = 94); and diabetes education (DE) (n = 82).  Blinded assessments occurred at 4, 8, and 12 months. The primary outcome was change in A1C; and Secondary outcomes were BMI, waist circumference, blood pressure, depressive symptoms, diabetes self-efficacy, and diabetes distress. | Intention-to-treat analyses  found significant A1C reductions for all (12 months: CC -0.47%, IC -0.52%, DE-0.57%), with no differences between arms  For BMI, CC showed significant improvement, and CC and DE led to  decreased waist circumference. The IC group showed greater blood pressure improvement. Results for secondary psychosocial outcomes favored the CC group. | collaborative couples’ intervention resulted in significant, lasting improvement in A1C levels, obesity measures, and some psychosocial outcomes. |
| 24 | Jae Hyoung Cho 2017 | 484 patients. | To evaluate the efficacy of an Internet-based integrated healthcare system for  diabetes management and safety | Patients in the intervention  group (n = 244) were treated with the Internet-based system for six months, while the control group (n = 240) received the usual outpatient management over the same period. | HbA1c, blood chemistries, anthropometric parameters, and adverse events were assessed at the beginning of the study, after three months, and the end of the study. | Upon six-month follow-up, HbA1c levels were significantly decreased from 7.86 ± 0.69% to 7.55 ± 0.86% within the intervention group (p < 0.001) compared to 7.81 ± 0.66%  to 7.70 ± 0.88% within the control group | This e-healthcare system was effective for glucose control and body composition improvement |
| 25 | Claudio Dario 2017 | 299 DM patients with HbA1c >7.0% | To assess whether telemonitoring (TM) of DM patients improves health-related quality of life (HRQoL). | TM electronically transmitted glucose measurements to physicians during a 12-month follow-up. | It was a randomized controlled trial, with 208 patients in the TM group and 91 patients in the usual-care group. The SF-36v2 questionnaire was used to assess HRQoL. | the study did not find any  clinically important improvement in HRQoL, our primary endpoint. There was no statistically significant difference in HbA1c between the two groups: | Enhancement of HRQoL should be the most critical goal of DM healthcare delivery. Effects of TM on HRQoL of diabetic patients should be  studied further. |
| 26 | Weibin Zhou 2016 | 100 subjects with diabetes, aged 18-74years. | To evaluate the impact of the smart phone-based diabetes management application, Welltang, on glycated hemoglobin (HbA1c) | The Welltang intervention group received training for the use of Welltang, while the control group received their usual standard of care. | HbA1c, blood glucose, low-density lipoprotein cholesterol, weight, blood pressure, hypoglycemic events, satisfaction of patients to use Welltang, diabetes knowledge  of patients, and self-care behaviors were measured | The average decrease in HbA1c was 1.95% (21mmol/mol) in the intervention group and 0.79% (8mmol/mol) in the control group (P<0.001).  Measures of self-monitored blood glucose, diabetes knowledge, and self-care behaviors improved in patients in the intervention group. | Diabetes patients using the Welltang application achieved statistically significant improvements in HbA1c, blood glucose, satisfaction of patients to use of Welltang, diabetes knowledge, and self-care behaviors. |
| 27 | Maryam Peimani 2016 | 150 patients with diabetes type 2 | To assess the effectiveness of Mobile  Short Message Service (SMS) intervention on education of basic self-care skills  in patients with type 2 diabetes | Patients were randomized into three  groups: tailored SMS group, non-tailored SMS group, and the control group. In the tailored SMS group, each person received 75% of their messages based on the top two barriers to adherence that they had experienced and reported in their scale. In the non-tailored SMS group, random messages were sent to every patient. | Biochemical parameters including HbA1c, FBS, lipid profile was evaluated for the three groups at baseline and after 12 weeks. self-care Inventory (SCI), Diabetes Management Self-Efficacy Scale (DMSES) and Diabetes Self-Care Barriers assessment scale for Older Adults (DSCB-OA) were done. | After 12 weeks, although HgA1c levels did not significantly change, significant decline was observed in FBS and mean BMI in both intervention groups.  Mean SCI-R scores significantly increased and mean DSCB and DMSES scores significantly decreased in both tailored and non-tailored SMS groups. | Sending short text messages as a method of education in conjunction with conventional diabetes treatment can improve glycemic control and positively  influence other aspects of diabetes self-care |
| 28 | Sanne van der Weegen 2015 | Twenty-four family | It's Life! a monitoring and feedback tool embedded in the Self-Management Support Program (SSP) is an attempt to stimulate physical activity in people with chronic obstructive pulmonary disease or type 2 diabetes treated in primary care. | Participants were randomly assigned to one of three groups in which  participants received the tool + SSP (group 1), the SSP (group 2), or care as usual (group 3). | The primary outcome measure was minutes of physical activity per  day. The secondary outcomes were general and exercise self-efficacy and quality of life. Outcomes were measured at baseline after the intervention (4-6 months),  and 3 months thereafter. | The group that received the entire intervention (tool + SSP) showed more physical activity directly after the intervention than Group 3 (mean difference 11.73, 95% CI 6.21-17.25; P<.001), and Group 2 (mean difference 7.86, 95% CI 2.18-13.54; P=.003) | The combination of counseling with the tool proved an effective way to stimulate physical activity. Counseling without the tool was not effective.  Future research about the cost effectiveness and application under more tailored conditions and in other target groups is recommended. |
| 29 | Sarah Pludwinski 2016 | 11 Participants | A qualitative evaluation of participants in a larger T2DM self-management randomized controlled trial (RCT) conducted at the Black Creek Community Health Centre (BCCHC) in Toronto, Canada | Key elements in the intervention were the provision of a smartphone and self-monitoring software. The  interviews focused on use of a smartphone and the effects on motivation for health behavior change. | The study is based on semi-structured interviews that were audio taped and analyzed with a thematic analytic approach.  The RCT compared the effectiveness of six months of smartphone-based  self-monitoring and health coaching with a control group who received health coaching without internet or smartphone-based aid. | Participants described increased control and confidence in dealing  with their condition and a substantial gain of knowledge about diabetes management. | Findings suggest that interventions with T2DM aided by smartphone software and health coaches actively engage individuals in improved hemoglobin  A1c (HbA1c) control. |
| 30 | Deborah A Greenwood 2015 | 90 Participants, aged 30-70 years, not using insulin with A1c  levels between 7.5% and 10.9% (58-96 mmol/mol). | To evaluate a telehealth remote  monitoring intervention using paired glucose testing and asynchronous data  analysis in adults with type 2 diabetes. | A 2-group randomized clinical trial was conducted comparing usual care  to telehealth remote monitoring with paired glucose testing and asynchronous virtual visits. | The telehealth remote monitoring  tablet computers transmitted glucose data and eased a complete feedback loop to educate participants, analyze actionable glucose data, and provide feedback.  Data from paired glucose testing were analyzed asynchronously using  computer-assisted pattern analysis and were shared with patients via the EHRweekly. | Both groups lowered A(1c) with an estimated average decrease of 0.70 percentage points in usual care group and 1.11 percentage points in the treatment group with a significant difference of 0.41 percentage points at 6 months | An eHealth model incorporating a complete feedback loop with  telehealth remote monitoring and paired glucose testing with asynchronous data  analysis significantly improved A(1c) levels compared to usual care. |
| 31 | Soo Lim2016 | 100 patients with type 2  diabetes aged over 60 years | A multidisciplinary u-healthcare system was designed by upgrading our clinical decision support system (CDSS) rule  engine and integrating a physical activity-monitoring device and dietary feedback  into a comprehensive package. | The u-healthcare group was educated to use a specially designed glucometer and an activity monitor that automatically transferred test  results to a hospital-based server | Patients were assigned randomly to a self-monitored blood glucose (SMBG) group (N = 50) or u-healthcare group (N = 50) for 6 months. The primary endpoint was the proportion of patients achieving glycated hemoglobin  (HbA1c) <7 % without hypoglycemia. Changes in body composition and lipid profiles were also investigated. | After 6 months of follow-up, the HbA1c level was significantly decreased in the u-healthcare group [8.0 ± 0.7 % (64.2 ± 8.8 mmol/mol) to 7.3 ± 0.9 % (56.7 ± 9.9 mmol/mol)] compared with the SMBG group [8.1 ± 0.8 % (64.9 ± 9.1 mmol/mol) to 7.9 ± 1.2 % (63.2 ± 12.3 mmol/mol)] (P < 0.01). | This u-healthcare service supplied effective management for older  patients with type 2 diabetes |
| 32 | Joni S Williams 2014 | 200 AfricanAmerican participants, 21 years of age or older and with a glycosylated hemoglobin A1c level ≥ 8%. | it is an ongoing 4-year randomized clinical trial to examine the use of technology-based feedback to tailor or augment diabetes education and skills training in African Americans with poorly controlled T2DM | Technology-intensified diabetes education and skills training  (TIDES) intervention in African Americans with poorly controlled T2DM | Participants will be randomized into one of two groups for 12 weeks of telephone interventions: (1) TIDES intervention group or (2) a usual-care group. Participants will be followed for 12 months to find the effect of the interventions on glycemic control | Study is ongoing and the primary  hypothesis is that, among African Americans with poorly controlled T2DM, patients randomized to the TIDES intervention will have significantly greater reduction in  glycosylated hemoglobin A1c at 12 months of follow-up compared to the usual-care group. | To find better ways to deliver diabetes education and skills training and provide important insight into effective strategies to improve metabolic control and hence reduce diabetes complications and mortality rates in African Americans with poorly controlled T2DM. |
| 33 | Mi Jung Rho 2014 | 81 type 2 diabetic patients | The relationship between user satisfaction and compliance or hemoglobin A1c (HbA1c) improvement was analyzed. | Telemedicine services is composed of the following six variables: usefulness, ease of use, compatibility, facilitating conditions, accessibility, and intimacy. | Data were collected from 81 type 2 diabetic patients who used telemedicine services. We used multiple regression analysis, logistic  regression analysis, simple linear regression, and the Wilcoxon signed-rank test to analyze the data. | The user assessments of the telemedicine services were very high, ranging from 5.8 to 6 points. Of the six variables, compatibility, ease of use, intimacy, and usefulness had a positive effect on overall satisfaction (p<0.05). Overall satisfaction and compliance were positively correlated with HbA1c improvement. | Results show that patient assessments of telemedicine services are crucial factors for clinical outcome improvement. In addition, higher satisfaction and more frequent self-assessments can improve clinical outcomes. |
| 34 | Bonnie J Wakefield 2014 | 108 patients with type 2 diabetes and hypertension | To evaluate the effectiveness of short-term targeted use of remote data transmission on treatment outcomes in patients with diabetes who had either out-of-range hemoglobin A1c (A1c) and/or blood pressure (BP) measurements. | Short-term targeted use of remote data transmission on treatment outcomes in patients with diabetes who had either out-of-range  hemoglobin A1c (A1c) and/or blood pressure (BP) measurements. | It is a randomized controlled clinical trial design compared in-home monitoring (n=55) and usual care (n=53) in patients with type 2 diabetes and hypertension being treated in primary care clinics. Primary  outcomes were A1c and systolic BP after a 12-week intervention. | No significant differences between the intervention and control groups on either A1c or systolic BP following the intervention. | Addition of technology alone is unlikely to lead to improvements in outcomes. Practices need to be selective in their use of telemonitoring with patients, limiting it to patients who be motivated or a meaningful change in care, such as starting insulin. |
| 35 | Thirunavukkarasu Sathish 2013 | A total of 60 polling booths are randomized to the intervention  arm or control arm in rural Kerala, India | The protocol for a cluster randomized controlled trial of a peer-led lifestyle intervention program to prevent diabetes in Kerala, India. | Participants in the intervention arm receive: (1) eleven peer-led  small group sessions to motivate, guide and support in planning, initiation, and maintenance of lifestyle changes; (2) two diabetes prevention education sessions led by experts to raise awareness on T2DM risk factors, prevention, and management; (3) a participant handbook having information primarily on peer  support and its role in aiding with lifestyle modification; (4) a participant workbook to guide self-monitoring of lifestyle behaviors, goal setting and goal review; (5) the health education booklet that is given to the control arm. Follow-up assessments are conducted at 12 and 24 months. | The primary outcome is  incidence of T2DM. Secondary outcomes include behavioral, psychosocial, clinical, and biochemical measures. An economic evaluation is planned. | Study is ongoing | Results from this trial will contribute to improved policy and  practice about lifestyle intervention programs to prevent diabetes in India  and other resource-constrained settings |
| 36 | Alexander Lavretsky 2013 | 14 type 2 diabetes patients | To explore the feasibility of stepwise self-titration of oral glucose-lowering medication guided by a mobile telephone-based telehealth platform for improving glycemic control in type 2 diabetes. | Intervention group patients followed a stepwise treatment plan for titration of oral glucose-lowering medication with self-monitoring of  glycemia using real-time graphical feedback on a mobile telephone and remote nurse monitoring using a Web-based tool | 3476 type 2 diabetes patients were screened; 94% of the ineligible did not  meet the eligibility criteria for hemoglobin A1c (HbA1c) or current treatment. 14 patients were recruited to a one-year feasibility study with 1:1 randomization. Interim analysis at 6  months. | The median (IQR) change in HbA1c from baseline to six months was  -10 (-21 to 3) mmol/mol (-0.9% [-1.9% to 0%]) in the intervention group and -5 (-13 to 6) mmol/mol (-0.5% [-1.2% to 0.6%]) in the control group. | Self-titration of oral glucose-lowering medication in type 2 diabetes with self-monitoring and remote monitoring of glycemia is possible, and further studies using adapted recruitment strategies are required to evaluate whether it improves clinical outcomes. |
| 37 | Paul C Tang 2013 | 415 patients with type 2 diabetes with baseline glycosylated hemoglobin (A1C) values  ≥7.5%. | To evaluate an online disease management system supporting patients  with uncontrolled type 2 diabetes. | The intervention included: (1) wirelessly uploaded home glucometer readings with graphical feedback; (2) comprehensive patient-specific diabetes summary status  report; (3) nutrition and exercise logs; (4) insulin record; (5) online messaging with the patient's health team; (6) nurse care manager and dietitian supplying advice and medication management; and (7) personalized text and video educational 'nuggets' dispensed electronically by the care team. | Engaging and Motivating Patients Online with Enhanced Resources for Diabetes controlled trial of  patients from primary care sites sharing an electronic health record | Compared with usual care (UC, n=189), patients in the intervention (INT, n=193) group had significantly reduced A1C at 6 months (-1.32% INT vs -0.66% UC; p<0.001). At 12 months, the differences were not significant (-1.14% INT vs -0.95% UC; p=0.133). | A nurse-led, multidisciplinary health team can manage a population  of diabetic patients in an online disease management program. |
| 38 | Emily D Williams 2012 | 120 Adults with type 2 diabetes, with HbA1c greater than or equal to 7.5 % | Australian TLC (Telephone-Linked Care) Diabetes program for effective self-management of diabetes and reduction  of diabetes-related complications. | Patients were randomly distributed (4 × 4 block randomized block design) to receive an automated, interactive telephone-delivered management intervention or usual routine care | Baseline sociodemographic,  behavioral and medical history data were collected by self-administered  questionnaires and biological data were obtained during hospital appointments.  Health-related quality of life (HRQL) was measured using the SF-36. | There were no differences in demographic, socioeconomic and behavioral variables  between the study arms at baseline.  Participants receiving the Australian TLC (Telephone-Linked Care) Diabetes program showed a 0.8% decrease in geometric mean HbA(1c) from 8.7% to 7.9%, compared with a 0.2% HbA(1c) reduction (8.9% to 8.7%) in the usual care arm (p = 0.002). | Findings show the efficacy of the Australian TLC Diabetes program with clinically significant post-intervention improvements in both glycemic control and mental HRQL. |
| 39 | Paula M Trief 2013 | 1665 medically underserved Medicare patients | To examine the change in adherence over time and in response to a telemedicine intervention for elderly diabetes patients in Hispanic American and African American patients compared to white diabetes patients | The Informatics for Diabetes Education and Telemedicine (IDEATel) project randomized medically underserved Medicare patients (n= to telemedicine case  management (televideo educator visits, individualized goal setting/problem  solving) or usual care. | Annual assessment included A1c and self-reported adherence (Summary of Diabetes Self-Care Activities scale.  SAS PROC Mixed was used with non-linear terms to examine mediating effects of adherence on A1c, by performing tests of the mediating path coefficients. | self-reported adherence improved for the treatment group  compared to usual care (p<0.001)  There was no significant interaction with racial/ethnic group membership, i.e., all groups improved | A unique, tailored telemedicine intervention was effective in  achieving improved adherence to diabetes self-care. |
| 40 | Charlene C Quinn 2013 | 163 patients with type  2 diabetes. | The Mobile Diabetes Intervention Study, randomly assigned 26 primary care practices to one of three stepped treatment groups or a control group (usual care). | Maximal treatment was a mobile- and web-based self-management patient coaching system and provider decision support. Patients received automated, real-time educational and behavioral messaging in response to individually analyzed blood glucose values, diabetes medications, and lifestyle behaviors communicated by mobile phone | Providers received quarterly reports summarizing patient's glycemic control, diabetes medication management, lifestyle behaviors, and evidence-based treatment options. The primary outcome was change  in glycated hemoglobin levels over a 1-year treatment period. Secondary outcomes were changes in patient-reported diabetes symptoms, diabetes distress, depression, and other clinical (blood pressure) and laboratory (lipid) values. | The mean declines in glycated hemoglobin were 1.9% in the maximal treatment group and 0.7% in the usual care group, a difference of 1.2% (P = 0.001) [corrected] over 12 months. Appreciable differences were not saw between groups for patient-reported diabetes distress, depression, diabetes symptoms, or blood pressure and lipid levels (all P > 0.05) | The combination of behavioral mobile coaching with blood glucose data, lifestyle behaviors, and patient self-management data individually analyzed and presented with evidence-based guidelines to providers substantially reduced glycated hemoglobin levels over 1 year. |
